# Supplementary material
Source: publisher figshare collection journal article supplement (https://frontiersin.figshare.com/ndownloader/files/22443809)
Supplement: Supplementary file [file 22443809]

Supplementary Table 1. The classification results based on other diffusion features

|                                                                                 | RD          | AD          | MD          |
|---------------------------------------------------------------------------------|-------------|-------------|-------------|
| Range of feature number (when the highest classification accuracy was achieved) | 3,000~3,100 | 1,900~2,800 | 2,000~3,000 |
| Optimal feature number                                                          | 3,000       | 2,400       | 2,500       |
| Accuracy                                                                        | 68.75%      | 66.67%      | 70.83%      |
| Specificity                                                                     | 76.92%      | 69.23%      | 76.92%      |
| Sensitivity                                                                     | 59.09%      | 63.64%      | 63.64%      |
| AUC                                                                             | 0.745       | 0.712       | 0.726       |
| <i>P</i> value in permutation test                                              | 0.0152      | 0.0474      | 0.0163      |

RD, radial diffusivity; AD, axial diffusivity; MD, mean diffusivity
